# Supplementary material for: Comparing the Clinical and Economic Outcomes Associated with Adjuvanted versus High-Dose Trivalent Influenza Vaccine among Adults Aged ≥ 65 Years in the US during the 2019–20 Influenza Season—A Retrospective Cohort Analysis
Source: MDPI journal article supplement (doi:10.3390/vaccines9101146), 2021-10-08
Supplement: s1 [file s1]

## Supplementary Material

**Table S1. Adjusted rVE (95% CI) – post-IPTW and Poisson regression – aIIV3 vs. HD-IIV3e**

| Measure                                             | Adjusted rVE |        |       |         |
|-----------------------------------------------------|--------------|--------|-------|---------|
|                                                     | rVE          | LCL    | UCL   | p-value |
| <b>MAIN ANALYSIS</b>                                |              |        |       |         |
| Influenza-related hospitalizations/ER visits        | 3.1%         | -2.8%  | 8.6%  | 0.2978  |
| All-cause hospitalizations                          | -0.7%        | -1.6%  | 0.3%  | 0.1848  |
| Any CRD-related hospitalization/ER visit            | 0.9%         | 0.0%   | 1.7%  | 0.0483  |
| Pneumonia hospitalizations/ER visit                 | 1.7%         | -0.4%  | 3.7%  | 0.1153  |
| Asthma/COPD/bronchial hospitalizations/ER visits    | 0.9%         | -0.9%  | 2.6%  | 0.3308  |
| Coronary artery hospitalizations/ER visits          | -1.7%        | -3.5%  | 0.1%  | 0.0625  |
| MI hospitalizations/ER visits                       | -4.5%        | -9.0%  | -0.2% | 0.0396  |
| Congestive heart failure hospitalizations/ER visits | -0.1%        | -2.0%  | 1.8%  | 0.9364  |
| Cerebrovascular hospitalizations/ER visits          | 2.0%         | -0.7%  | 4.5%  | 0.1393  |
| Stroke hospitalizations/ER visits                   | 2.0%         | -0.7%  | 4.6%  | 0.1385  |
| UTI hospitalizations                                | 2.3%         | -1.1%  | 5.6%  | 0.1846  |
| <b>AGE GROUP 65 - 74</b>                            |              |        |       |         |
| Influenza-related hospitalization/ER visit          | 4.5%         | -4.0%  | 12.4% | 0.2854  |
| Any CRD-related hospitalizations/ER visits          | 1.4%         | 0.0%   | 2.7%  | 0.0435  |
| <b>AGE GROUP 75 - 84</b>                            |              |        |       |         |
| Influenza-related hospitalization/ER visit          | 6.6%         | -3.2%  | 15.6% | 0.1803  |
| Any CRD-related hospitalizations/ER visits          | 0.6%         | -0.8%  | 2.0%  | 0.3916  |
| <b>AGE GROUP ≥85</b>                                |              |        |       |         |
| Influenza-related hospitalization/ER visit          | -8.8%        | -25.0% | 5.3%  | 0.2348  |
| Any CRD-related hospitalizations/ER visits          | -0.1%        | -1.9%  | 1.7%  | 0.9568  |
| <b>HIAP</b>                                         |              |        |       |         |
| Influenza-related hospitalization/ER visit          | 3.6%         | -2.4%  | 9.3%  | 0.2359  |
| Any CRD-related hospitalizations/ER visits          | 1.5%         | 0.5%   | 2.5%  | 0.0026  |
| <b>SHORTENED INFLUENZA PERIOD</b>                   |              |        |       |         |
| Influenza-related hospitalization/ER visit          | 2.8%         | -4.2%  | 9.4%  | 0.4261  |
| Any CRD-related hospitalizations/ER visits          | 0.8%         | -0.2%  | 1.7%  | 0.1007  |

| DOUBLY ROBUST                                |      |       |      |        |
|----------------------------------------------|------|-------|------|--------|
| Any CRD-related hospitalization/ER visit     | 3.0% | -2.9% | 8.5% | 0.3109 |
| Influenza-related hospitalizations/ER visits | 0.7% | -0.1% | 1.6% | 0.0942 |

aIIV3 = adjuvanted trivalent influenza vaccine; CRD = cardio-respiratory disease; ER = emergency room; HD-IIV3e = high-dose trivalent influenza vaccine;  
rVE = relative vaccine effectiveness; UTI = urinary tract infection

**Figure S1. Proportion of patients with influenza-related HCRU over the variable follow-up period (post-IPTW)**

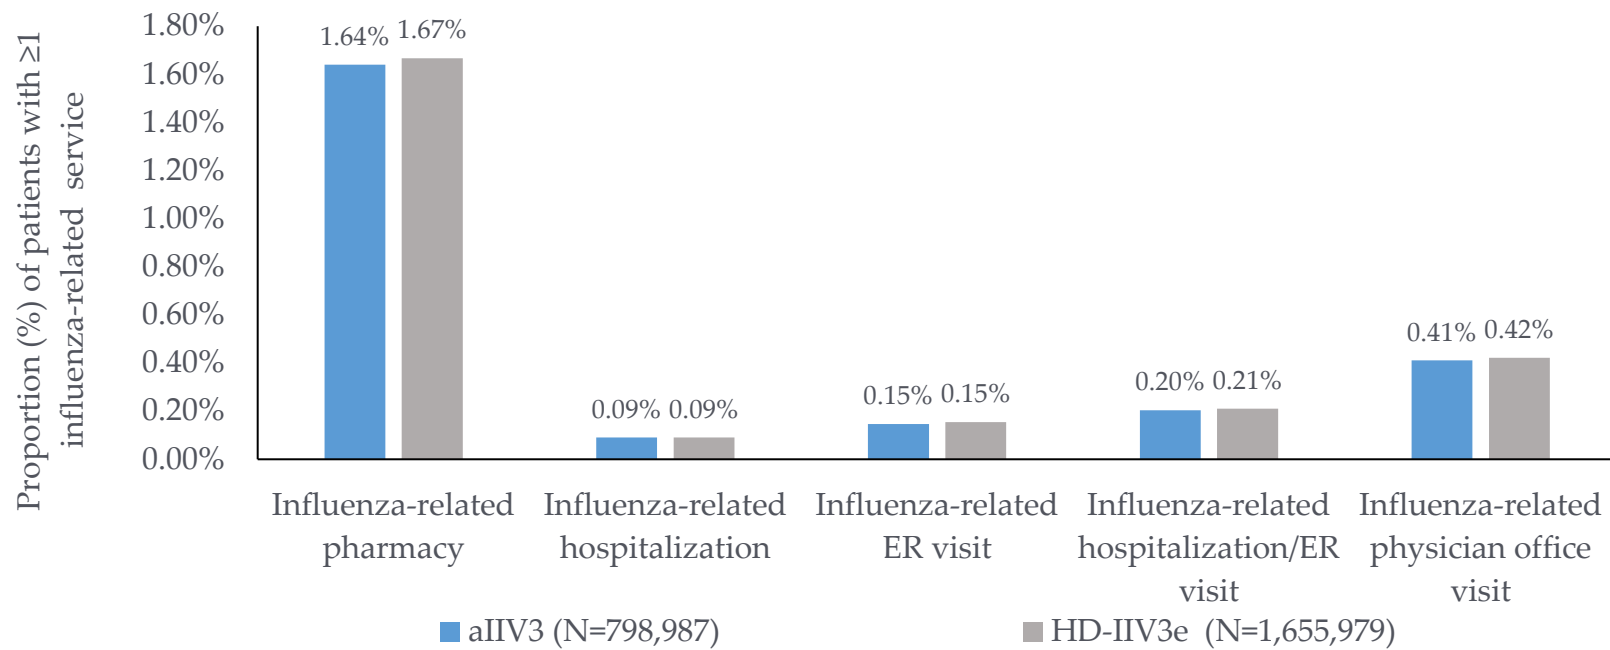

aIIV3 = adjuvanted trivalent influenza vaccine; ER = emergency room; HD-IIV3e = high-dose trivalent influenza vaccine

**Figure S2. Mean annualized influenza-related healthcare costs over the variable follow-up period (Post-IPTW)**

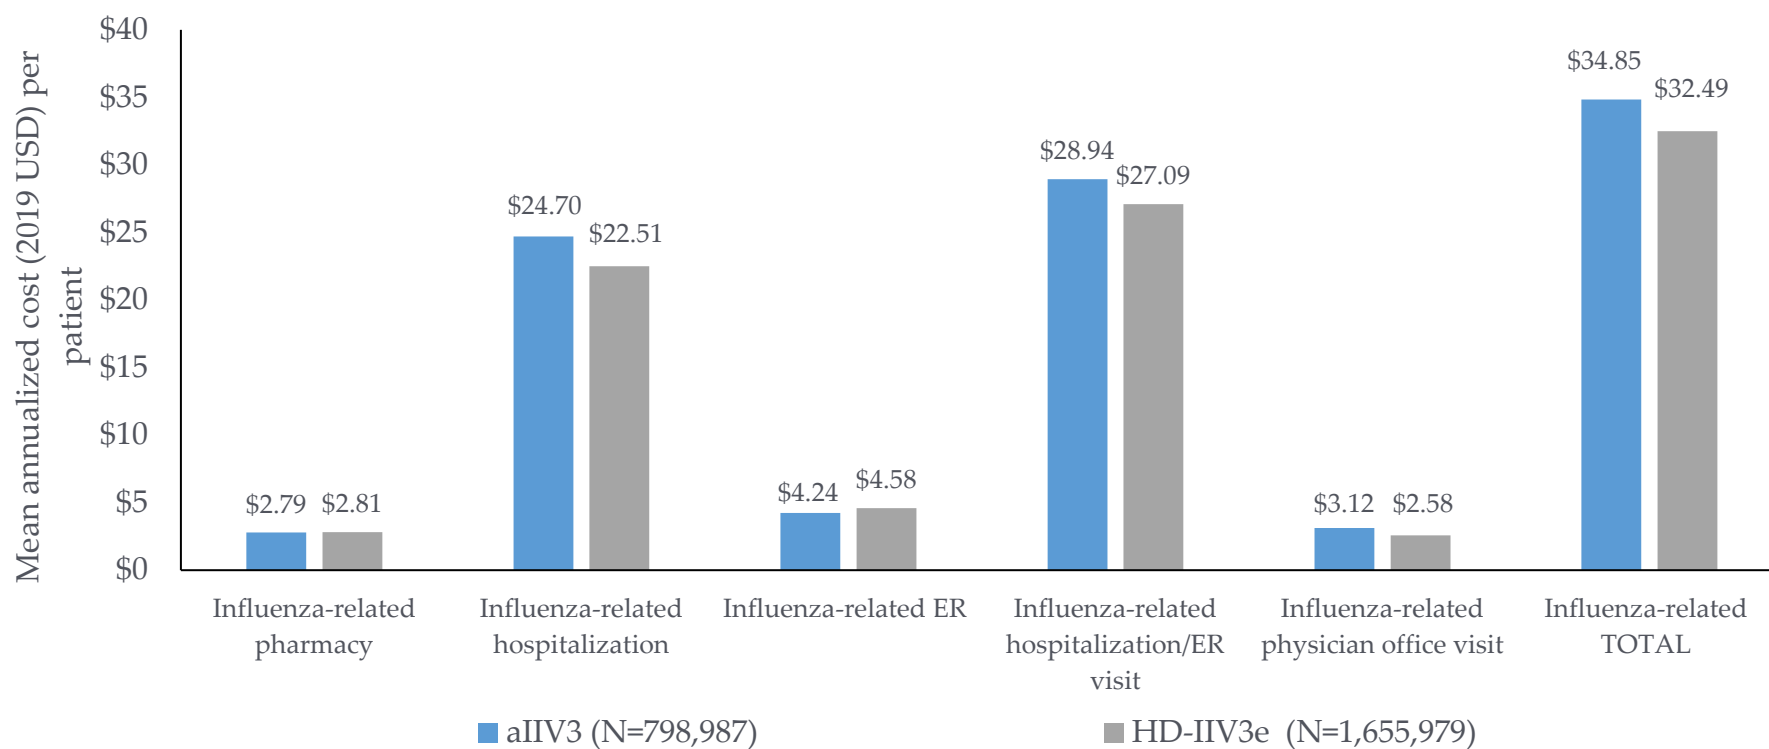

TOTAL = pharmacy + hospitalization + ER + outpatient office visit

Inpatient cost identified from CDM only

aIIV3 = adjuvanted trivalent influenza vaccine; ER = emergency room; HD-IIV3e = high-dose trivalent influenza vaccine

Table S2: All-cause HCRU and annualized cost during the post-index period - post-IPTW

| <i>Vaccine Cohort</i>                                                         | aIIV3 (N=798,987) |       |          |          |         | HD-IIV3e (N=1,655,979) |       |          |          |         |                      |
|-------------------------------------------------------------------------------|-------------------|-------|----------|----------|---------|------------------------|-------|----------|----------|---------|----------------------|
| Outcome (by visit type)                                                       | n                 | %     | Mean     | SD       | Median  | n                      | %     | Mean     | SD       | Median  | p-value <sup>1</sup> |
| <b><u>Pharmacy</u></b>                                                        |                   |       |          |          |         |                        |       |          |          |         |                      |
| Patients with ≥1 pharmacy claim (n, %)                                        | 774,138           | 96.9% |          |          |         | 1,611,321              | 97.3% |          |          |         | <.0001               |
| Number of pharmacy claims per patient (mean, SD, median)                      |                   |       | 13.3     | 11.9     | 10      |                        |       | 13.5     | 11.6     | 11      | <.0001               |
| <b><u>Inpatient hospitalization</u></b>                                       |                   |       |          |          |         |                        |       |          |          |         |                      |
| Patients with ≥1 hospitalization (n, %)                                       | 16,034            | 2.0%  |          |          |         | 33,972                 | 2.1%  |          |          |         | 0.0204               |
| Number of hospitalizations per patient (mean, SD, median)                     |                   |       | 0.0      | 0.2      | 0       |                        |       | 0.0      | 0.2      | 0       | 0.0796               |
| <b><u>ER</u></b>                                                              |                   |       |          |          |         |                        |       |          |          |         |                      |
| Patients with ≥1 ER visit (n, %) (in either Dx or CDM based on service dates) | 99,499            | 12.5% |          |          |         | 207,433                | 12.5% |          |          |         | 0.1045               |
| Number of ER visits per patient (mean, SD, median)                            |                   |       | 0.2      | 0.6      | 0       |                        |       | 0.2      | 0.6      | 0       | 0.3450               |
| <b><u>Physician office visits</u></b>                                         |                   |       |          |          |         |                        |       |          |          |         |                      |
| Patients with ≥1 physician office visit (n, %)                                | 614,623           | 76.9% |          |          |         | 1,264,841              | 76.4% |          |          |         | <.0001               |
| Number of physician office visits per patient (mean, SD, median)              |                   |       | 3.5      | 4.9      | 2       |                        |       | 3.4      | 4.7      | 2       | <.0001               |
| <b><u>Total annualized Costs</u></b>                                          |                   |       |          |          |         |                        |       |          |          |         |                      |
| Total annualized cost per patient                                             | 798,987           | 100%  | \$14,944 | \$64,666 | \$3,917 | 1,655,979              | 100%  | \$14,902 | \$49,619 | \$3,980 | 0.5730               |
| Total annualized inpatient cost per patient                                   | 798,987           | 100%  | \$2,020  | \$25,805 | \$0     | 1,655,979              | 100%  | \$2,060  | \$25,402 | \$0     | 0.2486               |
| Total annualized ER cost per patient                                          | 798,987           | 100%  | \$427    | \$2,629  | \$0     | 1,655,979              | 100%  | \$430    | \$2,614  | \$0     | 0.3992               |
| Total annualized outpatient cost per patient                                  | 798,987           | 100%  | \$8,183  | \$53,942 | \$1,045 | 1,655,979              | 100%  | \$8,014  | \$34,334 | \$1,017 | 0.0030               |
| Total annualized pharmacy cost per patient                                    | 798,987           | 100%  | \$4,313  | \$13,649 | \$1,028 | 1,655,979              | 100%  | \$4,397  | \$13,417 | \$1,083 | <.0001               |

<sup>1</sup>Pair-wise comparisons conducted using weighted t-tests (mean) for continuous variables and weighted chi-square tests for categorical variables

Variable follow-up period: (index date + 14) to end of influenza season

aIIV3 = adjuvanted trivalent influenza vaccine; ER = emergency room; HD-IIV3e = high-dose trivalent influenza vaccine
